# Supplementary material
Source: HighWire-hosted journal article supplement (https://jnm.snmjournals.org/highwire/filestream/99306/field_highwire_adjunct_files/0/243139_Supplemental_Data.pdf)
Supplement: 243139_Supplemental_Data.pdf [file 243139_Supplemental_Data.pdf]

**Supplemental Tables 1-8: Curie score measurements in individual patients in pre-therapy and post-therapy imaging with description of the score by anatomical location.** Individual patients are represented in 1-8.

| 1                     | Pre-Therapy Curie Score         |                                |                   | Post-Therapy Curie Score        |                                |                   |
|-----------------------|---------------------------------|--------------------------------|-------------------|---------------------------------|--------------------------------|-------------------|
|                       | I-123 MIBG<br>Planar<br>imaging | I-123 MIBG<br>SPECT<br>imaging | I-124 MIBG<br>PET | I-123 MIBG<br>Planar<br>imaging | I-123 MIBG<br>SPECT<br>imaging | I-124 MIBG<br>PET |
| <b>Head</b>           | 1                               |                                | 2                 |                                 |                                | 0                 |
| <b>Chest</b>          | 0                               |                                | 2                 |                                 |                                | 0                 |
| <b>T spine</b>        | 0                               |                                | 0                 |                                 |                                | 0                 |
| <b>L spine</b>        | 0                               |                                | 0                 |                                 |                                | 0                 |
| <b>Pelvis</b>         | 2                               |                                | 2                 |                                 |                                | 0                 |
| <b>Upper<br/>Arms</b> | 0                               |                                | 1                 |                                 |                                | 0                 |
| <b>Lower<br/>Arms</b> | 0                               |                                | 0                 |                                 |                                | 0                 |
| <b>Femurs</b>         | 1                               |                                | 2                 |                                 |                                | 0                 |
| <b>Lower<br/>Legs</b> | 0                               |                                | 0                 |                                 |                                | 0                 |
| <b>Soft tissue</b>    | 0                               |                                | 0                 |                                 |                                | 0                 |
| <b>Total score</b>    | 4                               |                                | 9                 |                                 |                                | 0                 |

| 2                     | Pre-Therapy Curie Score         |                                |                   | Post-Therapy Curie Score        |                                |                   |
|-----------------------|---------------------------------|--------------------------------|-------------------|---------------------------------|--------------------------------|-------------------|
|                       | I-123 MIBG<br>Planar<br>imaging | I-123 MIBG<br>SPECT<br>imaging | I-124 MIBG<br>PET | I-123 MIBG<br>Planar<br>imaging | I-123 MIBG<br>SPECT<br>imaging | I-124 MIBG<br>PET |
| <b>Head</b>           | 2                               |                                | 2                 | 2                               | 2                              | 2                 |
| <b>Chest</b>          | 2                               |                                | 2                 | 2                               | 2                              | 2                 |
| <b>T spine</b>        | 2                               |                                | 3                 | 3                               | 3                              | 3                 |
| <b>L spine</b>        | 2                               |                                | 3                 | 3                               | 3                              | 3                 |
| <b>Pelvis</b>         | 2                               |                                | 2                 | 2                               | 2                              | 2                 |
| <b>Upper<br/>Arms</b> | 3                               |                                | 3                 | 3                               | 3                              | 3                 |
| <b>Lower<br/>Arms</b> | 0                               |                                | 0                 | 0                               | 0                              | 0                 |
| <b>Femurs</b>         | 3                               |                                | 3                 | 3                               | 3                              | 3                 |
| <b>Lower<br/>Legs</b> | 2                               |                                | 2                 | 2                               | 2                              | 2                 |
| <b>Soft tissue</b>    | 0                               |                                | 0                 | 0                               | 0                              | 0                 |
| <b>Total score</b>    | 18                              |                                | 20                | 20                              | 20                             | 20                |

| 3                     | Pre-Therapy Curie Score         |                                |                   | Post-Therapy Curie Score        |                                |                   |
|-----------------------|---------------------------------|--------------------------------|-------------------|---------------------------------|--------------------------------|-------------------|
|                       | I-123 MIBG<br>Planar<br>imaging | I-123 MIBG<br>SPECT<br>imaging | I-124 MIBG<br>PET | I-123 MIBG<br>Planar<br>imaging | I-123 MIBG<br>SPECT<br>imaging | I-124 MIBG<br>PET |
| <b>Head</b>           | 0                               |                                |                   | 0                               | 0                              | 0                 |
| <b>Chest</b>          | 0                               |                                |                   | 0                               | 1                              | 1                 |
| <b>T spine</b>        | 0                               |                                |                   | 0                               | 1                              | 1                 |
| <b>L spine</b>        | 0                               |                                |                   | 0                               | 2                              | 2                 |
| <b>Pelvis</b>         | 2                               |                                |                   | 2                               | 2                              | 2                 |
| <b>Upper<br/>Arms</b> | 0                               |                                |                   | 0                               | 0                              | 0                 |
| <b>Lower<br/>Arms</b> | 0                               |                                |                   | 0                               | 0                              | 0                 |
| <b>Femurs</b>         | 0                               |                                |                   | 0                               | 0                              | 2                 |
| <b>Lower<br/>Legs</b> | 0                               |                                |                   | 0                               | 0                              | 0                 |
| <b>Soft tissue</b>    | 0                               |                                |                   | 0                               | 0                              | 0                 |
| <b>Total score</b>    | 2                               |                                |                   | 2                               | 6                              | 8                 |

| 4                     | Pre-Therapy Curie Score         |                                |                   | Post-Therapy Curie Score        |                                |                   |
|-----------------------|---------------------------------|--------------------------------|-------------------|---------------------------------|--------------------------------|-------------------|
|                       | I-123 MIBG<br>Planar<br>imaging | I-123 MIBG<br>SPECT<br>imaging | I-124 MIBG<br>PET | I-123 MIBG<br>Planar<br>imaging | I-123 MIBG<br>SPECT<br>imaging | I-124 MIBG<br>PET |
| <b>Head</b>           | 0                               | 0                              | 0                 | 0                               |                                |                   |
| <b>Chest</b>          | 0                               | 0                              | 1                 | 0                               |                                |                   |
| <b>T spine</b>        | 0                               | 0                              | 0                 | 0                               |                                |                   |
| <b>L spine</b>        | 0                               | 0                              | 0                 | 0                               |                                |                   |
| <b>Pelvis</b>         | 0                               | 0                              | 0                 | 0                               |                                |                   |
| <b>Upper<br/>Arms</b> | 0                               | 0                              | 0                 | 0                               |                                |                   |
| <b>Lower<br/>Arms</b> | 0                               | 0                              | 0                 | 0                               |                                |                   |
| <b>Femurs</b>         | 0                               | 0                              | 0                 | 0                               |                                |                   |
| <b>Lower<br/>Legs</b> | 0                               | 0                              | 0                 | 0                               |                                |                   |
| <b>Soft tissue</b>    | 2                               | 2                              | 2                 | 0                               |                                |                   |
| <b>Total score</b>    | 2                               | 2                              | 3                 | 0                               |                                |                   |

| 5                     | Pre-Therapy Curie Score         |                                |                   | Post-Therapy Curie Score        |                                |                   |
|-----------------------|---------------------------------|--------------------------------|-------------------|---------------------------------|--------------------------------|-------------------|
|                       | I-123 MIBG<br>Planar<br>imaging | I-123 MIBG<br>SPECT<br>imaging | I-124 MIBG<br>PET | I-123 MIBG<br>Planar<br>imaging | I-123 MIBG<br>SPECT<br>imaging | I-124 MIBG<br>PET |
| <b>Head</b>           | 2                               | 2                              | 1                 | 0                               | 0                              |                   |
| <b>Chest</b>          | 0                               | 0                              | 2                 | 0                               | 0                              |                   |
| <b>T spine</b>        | 0                               | 0                              | 1                 | 0                               | 0                              |                   |
| <b>L spine</b>        | 0                               | 0                              | 0                 | 0                               | 0                              |                   |
| <b>Pelvis</b>         | 0                               | 0                              | 0                 | 0                               | 0                              |                   |
| <b>Upper<br/>Arms</b> | 0                               | 0                              | 0                 | 0                               | 0                              |                   |
| <b>Lower<br/>Arms</b> | 0                               | 0                              | 0                 | 0                               | 0                              |                   |
| <b>Femurs</b>         | 0                               | 0                              | 1                 | 1                               | 1                              |                   |
| <b>Lower<br/>Legs</b> | 0                               | 0                              | 1                 | 0                               | 0                              |                   |
| <b>Soft tissue</b>    | 0                               | 0                              | 0                 | 0                               | 0                              |                   |
| <b>Total score</b>    | 2                               | 2                              | 6                 | 1                               | 1                              |                   |

| 6                     | Pre-Therapy Curie Score         |                                |                   | Post-Therapy Curie Score        |                                |                   |
|-----------------------|---------------------------------|--------------------------------|-------------------|---------------------------------|--------------------------------|-------------------|
|                       | I-123 MIBG<br>Planar<br>imaging | I-123 MIBG<br>SPECT<br>imaging | I-124 MIBG<br>PET | I-123 MIBG<br>Planar<br>imaging | I-123 MIBG<br>SPECT<br>imaging | I-124 MIBG<br>PET |
| <b>Head</b>           | 0                               | 0                              | 0                 |                                 |                                |                   |
| <b>Chest</b>          | 0                               | 0                              | 0                 |                                 |                                |                   |
| <b>T spine</b>        | 0                               | 0                              | 0                 |                                 |                                |                   |
| <b>L spine</b>        | 0                               | 0                              | 0                 |                                 |                                |                   |
| <b>Pelvis</b>         | 0                               | 0                              | 0                 |                                 |                                |                   |
| <b>Upper<br/>Arms</b> | 0                               | 0                              | 0                 |                                 |                                |                   |
| <b>Lower<br/>Arms</b> | 0                               | 0                              | 0                 |                                 |                                |                   |
| <b>Femurs</b>         | 1                               | 1                              | 1                 |                                 |                                |                   |
| <b>Lower<br/>Legs</b> | 0                               | 0                              | 0                 |                                 |                                |                   |
| <b>Soft tissue</b>    | 0                               | 0                              | 0                 |                                 |                                |                   |
| <b>Total score</b>    | 1                               | 1                              | 1                 |                                 |                                |                   |

| 7                     | Pre-Therapy Curie Score         |                                |                   | Post-Therapy Curie Score        |                                |                   |
|-----------------------|---------------------------------|--------------------------------|-------------------|---------------------------------|--------------------------------|-------------------|
|                       | I-123 MIBG<br>Planar<br>imaging | I-123 MIBG<br>SPECT<br>imaging | I-124 MIBG<br>PET | I-123 MIBG<br>Planar<br>imaging | I-123 MIBG<br>SPECT<br>imaging | I-124 MIBG<br>PET |
| <b>Head</b>           | 1                               | 1                              | 2                 |                                 |                                |                   |
| <b>Chest</b>          | 1                               | 1                              | 2                 |                                 |                                |                   |
| <b>T spine</b>        | 0                               | 0                              | 2                 |                                 |                                |                   |
| <b>L spine</b>        | 2                               | 2                              | 2                 |                                 |                                |                   |
| <b>Pelvis</b>         | 2                               | 2                              | 2                 |                                 |                                |                   |
| <b>Upper<br/>Arms</b> | 0                               | 0                              | 2                 |                                 |                                |                   |
| <b>Lower<br/>Arms</b> | 0                               | 0                              | 2                 |                                 |                                |                   |
| <b>Femurs</b>         | 2                               | 2                              | 2                 |                                 |                                |                   |
| <b>Lower<br/>Legs</b> | 1                               | 1                              | 2                 |                                 |                                |                   |
| <b>Soft tissue</b>    | 0                               | 0                              | 0                 |                                 |                                |                   |
| <b>Total score</b>    | 9                               | 9                              | 18                |                                 |                                |                   |



| <b>8</b>              | <b>Pre-Therapy Curie Score</b>           |                                         |                           | <b>Post-Therapy Curie Score</b>          |                                         |                           |
|-----------------------|------------------------------------------|-----------------------------------------|---------------------------|------------------------------------------|-----------------------------------------|---------------------------|
| <b>Pt 1010</b>        | <b>I-123 MIBG<br/>Planar<br/>imaging</b> | <b>I-123 MIBG<br/>SPECT<br/>imaging</b> | <b>I-124 MIBG<br/>PET</b> | <b>I-123 MIBG<br/>Planar<br/>imaging</b> | <b>I-123 MIBG<br/>SPECT<br/>imaging</b> | <b>I-124 MIBG<br/>PET</b> |
| <b>Head</b>           | 2                                        | 2                                       | 2                         |                                          |                                         |                           |
| <b>Chest</b>          | 2                                        | 2                                       | 2                         |                                          |                                         |                           |
| <b>T spine</b>        | 2                                        | 2                                       | 2                         |                                          |                                         |                           |
| <b>L spine</b>        | 2                                        | 2                                       | 2                         |                                          |                                         |                           |
| <b>Pelvis</b>         | 2                                        | 2                                       | 2                         |                                          |                                         |                           |
| <b>Upper<br/>Arms</b> | 2                                        | 2                                       | 2                         |                                          |                                         |                           |
| <b>Lower<br/>Arms</b> | 0                                        | 0                                       | 0                         |                                          |                                         |                           |
| <b>Femurs</b>         | 2                                        | 2                                       | 2                         |                                          |                                         |                           |
| <b>Lower<br/>Legs</b> | 0                                        | 0                                       | 0                         |                                          |                                         |                           |
| <b>Soft tissue</b>    | 0                                        | 0                                       | 0                         |                                          |                                         |                           |
| <b>Total score</b>    | 14                                       | 14                                      | 14                        |                                          |                                         |                           |
